# Supplementary material for: Enhancing early medical education through mobile health care: An observational survey of medical student volunteers
Source: Research Square preprint supplement (doi:10.21203/rs.3.rs-7246810/v1), 2025-11-05
Supplement: Supplementary file 1 [file 27c58a0931b12d69c6493c8e.pdf]

# Mobile Health Initiative - Volunteer Survey

You have been selected to participate in our research study whose main purpose is to understand how volunteers perceive and benefit from their experience assisting with our Mobile Health Initiative (MHI), and to explore how this experience may impact their future careers in medicine. In order to collect data for this research, we have designed an anonymous survey which you may fill out at your own leisure. This survey consists of multiple choice questions and short text responses. You do not need to complete the survey if you do not want to. There is no harm or benefit. By submitting this survey, you are consenting to having your anonymous responses be used for research.

After you submit this survey, there will be a link to another form where you will enter just your name and email. By doing this, your responses will be kept anonymous. This will allow us to communicate with you regarding the drawing of \$50 gift cards.

If you have any questions about the survey, please contact Jameleddine Benhamida (benha057@umn.edu).

## 1. What year are you currently in medical school?

*Mark only one.*

*Mark only one oval.*

- ☐ MS1
- ☐ MS2
- ☐ MS3
- ☐ MS4
- ☐ Other: \_\_\_\_\_

2. What year in medical school did you volunteer with the UMN Mobile Health Initiative (MHI)?

*Check all that apply.*

*Check all that apply.*

- ☐ MS1  
☐ MS2  
☐ MS3  
☐ MS4  
☐ Volunteered after medical school  
☐ Other: \_\_\_\_\_

3. How long have you volunteered with MHI?

*Mark only one.*

*Mark only one oval.*

- ☐ <1 month  
☐ 2-6 months  
☐ 6-12 months  
☐ 1+ years  
☐ Other: \_\_\_\_\_

4. How did you first hear about this volunteering opportunity?

*Check all that apply.*

*Check all that apply.*

- ☐ Email  
☐ Physician  
☐ Friend/Family  
☐ Google  
☐ Other: \_\_\_\_\_

## 5. What motivated you to join MHI? (Multiple responses permitted)

*Check all that apply.*

*Check all that apply.*

- ☐ Wanted additional clinical experience outside of the classroom
- ☐ Wanted to work with underserved populations and those without access to healthcare
- ☐ Wanted to see if this could be a long-term career option
- ☐ Practicing using a different language in medicine
- ☐ Wanted to gain a different perspective on community medicine
- ☐ Other: \_\_\_\_\_

## 6. Have you previously participated in similar community health initiatives for underserved populations?

*If so, please specify in the "Other" category.*

*Check all that apply.*

- ☐ Yes
- ☐ No
- ☐ Other: \_\_\_\_\_

## 7. What aspects of volunteering with MHI did you find most rewarding?

---

---

---

---

---

## 8. How has volunteering with MHI affected your overall emotional/spiritual well-being?

---

9. How connected did you feel to the communities you served before volunteering with MHI?

*Mark only one oval.*

*Mark only one oval.*

|     |                       |                       |                       |                       |                       |            |
|-----|-----------------------|-----------------------|-----------------------|-----------------------|-----------------------|------------|
|     | 1                     | 2                     | 3                     | 4                     | 5                     |            |
| Not | <input type="radio"/> | Completely |

10. How connected did you feel to the communities you served while volunteering with MHI?

*Mark only one oval.*

*Mark only one oval.*

|     |                       |                       |                       |                       |                       |            |
|-----|-----------------------|-----------------------|-----------------------|-----------------------|-----------------------|------------|
|     | 1                     | 2                     | 3                     | 4                     | 5                     |            |
| Not | <input type="radio"/> | Completely |

11. In what specific ways has this experience enhanced your clinical skills and knowledge?

---

---

---

---

---

12. Did volunteering with MHI influence your specialty choice and career goals? If so, please briefly describe how.

---

---

---

---

---

13. Have you encountered any challenges or barriers while volunteering, and how have you addressed them?

---

---

---

---

---

14. Were there any skills or goals you were hoping to meet with the MHI that were not met? Please provide suggestions on how we can improve this aspect of your experience.

---

---

---

---

---

15. Have you filled out this survey before? If so, when? Please specify the time in the "Other" category.

*Check all that apply.*

*Check all that apply.*

☐ Yes

☐ No

☐ Not Sure

☐ Other: \_\_\_\_\_

16. Is there anything else you would like to share about your experience volunteering with MHI?

---

---

---

---

---

---

This content is neither created nor endorsed by Google.

Google Forms
